# Supplementary material
Source: Springer Nature journal article supplement (https://www.springermedizin.de/resource/supplementary/12913_2013_3383_MOESM1_ESM.pdf/9532682)
Supplement: MOESM1 [file 9532682]

## Inconsistent Policies, Standards, and Organizational Priorities

Differing Organizational Priorities

Lack of Standardized Information on eCHN

Inconsistent Interpretation of PHIPA

Inconsistent File Organization

Inconsistent Policies Regarding Email

Inconsistent Practices of Including Information in the Patient Chart

## Fragmentation of the Health Care System

Lack of a Common Language

Lack of Comprehensive Care Plan

Lack of Accountability for Information

# INFORMATION SHARING

## Issues Related to the Availability and Use of a Common Platform

Limited Knowledge of Care Plan

Inadequate Training

Limited Access to Platform

Lack of Common Platform

Security

Marginalization of Families

Information Not Targeted to End User

Type of Medium Not Accessible

Multiple Systems in Use

Difficulty Integrating Multiple Systems
